# Supplementary material for: Stable Translocation Intermediates Jam Global Protein Export in Plasmodium falciparum Parasites and Link the PTEX Component EXP2 with Translocation Activity
Source: PubMed Central journal article supplement (PMC4864081; doi:10.1371/journal.ppat.1005618), 2016-05-11
Supplement: ppat.1005618.s010.pdf [file ppat.1005618.s010.pdf]

**Table S2. Cloning strategy**

| Construct                          | Primers                                                                                                           | Template                                                                   | Cloned into                                   |
|------------------------------------|-------------------------------------------------------------------------------------------------------------------|----------------------------------------------------------------------------|-----------------------------------------------|
| SBP1-mDHFR-GFP                     | SBP-1fw(XhoI)<br>SBP-1rv(AvrII)                                                                                   | cDNA                                                                       | pARL2-REX2mDHFR-GFP<br>(Grüiring et. al 2012) |
| SBP1-mDHFR-GFP<br>PH mut           | GFP-PH mut fw BstBI<br>PH mut rv XmaI                                                                             | GFP PH mut<br>(Kruse et al, unpublished data)                              | pARL2<br>SBP-1mDHFR-GFP                       |
| REX2-GFP-mDHFR                     | REX2XhoI fw<br>GFPrv Nhe-XmaI<br>mDHFR Nhe fw<br>mDHFR Spe-XmaI                                                   | REX2-GFP<br>(Haase et al.,2009)<br>REX2mDHFR-GFP<br>(Grüiring et. al 2012) | pARL2-REX2mDHFR-GFP<br>(Grüiring et. al 2012) |
| REX2+3C-mDHFR-GFP                  | REX2XhoI fw<br>REX2rvAvrII Ext C-t                                                                                | synthesized gene                                                           | pARL2-REX2mDHFR-GFP<br>(Grüiring et. al 2012) |
| MAHRP1-mDHFR-GFP                   | MAHRP1 Xho fw<br>MAHRP1 AvrII rv                                                                                  | cDNA                                                                       | pARL2-REX2mDHFR-GFP<br>(Grüiring et. al 2012) |
| REX3-mDHFR-GFP                     | REX3 XhoI fw<br>REX3 AvrII rv                                                                                     | cDNA                                                                       | pARL2-REX2mDHFR-GFP<br>(Grüiring et. al 2012) |
| KAHRP-mDHFR-GFP                    | KAHRP Xho fw<br>KAHRP AvrII rv                                                                                    | cDNA                                                                       | pARL2-REX2mDHFR-GFP<br>(Grüiring et. al 2012) |
| PTP1-mDHFR-GFP                     | PTP1 XhoI fw<br>PTP1 rv AvrII                                                                                     | 3D7 genomic DNA                                                            | pARL2-REX2mDHFR-GFP<br>(Grüiring et. al 2012) |
| PTP1+3C-mDHFR-GFP                  | PTP1 XhoI fw<br>PTP1 rv SpeI                                                                                      | 3D7 genomic DNA                                                            | pARL2-REX2 (3C) mDHFR-GFP                     |
| STEVOR-mDHFR-GFP                   | STEVOR_0900900 XhoI fw<br>STEVOR_0900900 AvrII rv                                                                 | 3D7 genomic DNA                                                            | pARL2-REX2mDHFR-GFP<br>(Grüiring et. al 2012) |
| REX2-BPTIwt-GFP                    | BPTI fwAvrII<br>BPTI rv KpnI                                                                                      | synthesized gene                                                           | pARL2-REX2mDHFR-GFP<br>(Grüiring et. al 2012) |
| REX2-BPTImut-GFP                   | BPTI fwAvrII<br>BPTI rv KpnI                                                                                      | synthesized gene                                                           | pARL2-REX2mDHFR-GFP<br>(Grüiring et. al 2012) |
| SBP1-BPTIwt-GFP                    | SBP-1fw(XhoI)<br>SBP-1rv(AvrII)                                                                                   | cDNA                                                                       | REX2-BPTIwt-GFP                               |
| MAHRP1-BPTIwt-GFP                  | MAHRP1 Xho fw<br>MAHRP1 rv AvrII                                                                                  | cDNA                                                                       | REX2-BPTIwt-GFP                               |
| REX3-BPTI-GFP                      | REX3 XhoI fw<br>REX3 AvrII rv                                                                                     | cDNA                                                                       | REX2-BPTIwt-GFP                               |
| ΔCSBP1-BPTIwt-GFP                  | SBP-1fw(XhoI)<br>SBP259AvrIIrv                                                                                    | cDNA                                                                       | REX2-BPTIwt-GFP                               |
| ΔCSBP1-BPTImut-GFP                 | SBP-1fw(XhoI)<br>SBP259AvrIIrv                                                                                    | cDNA                                                                       | REX2-BPTImut-GFP                              |
| ΔNSBP1-BPTIwt-GFP                  | SBP-1fw(XhoI) /SBP1 40rv (Product1a)<br>SBP1 211fw/ SBP-259rv(AvrII)(Product1b)<br>SBP-1fw(XhoI) /SBP259rv(AvrII) | cDNA<br>cDNA<br>Product1a + Product1b                                      | REX2-BPTIwt-GFP                               |
| REX2+3C-BPTIwt-GFP                 | REX2XhoI fw<br>REX2rvAvrII Ext C-t                                                                                | synthesized gene                                                           | REX2-BPTIwt-GFP                               |
| PTP1-BPTI-GFP                      | PTP1 XhoI fw<br>PTP1 rv AvrII                                                                                     | 3D7 genomic DNA                                                            | REX2-BPTIwt-GFP                               |
| PTP1+3C-BPTI-GFP                   | PTP1 XhoI fw<br>PTP1 rv SpeI                                                                                      | 3D7 genomic DNA                                                            | REX2-(3C) BPTIwt-GFP                          |
| MSRP6mCherry                       | MSRP6 fw KpnI<br>MSRP6 rv AvrII                                                                                   | MSRP6-GFP<br>(Heiber et al., 2013)                                         | REX2mCherry<br>(Grüiring et. al 2012)         |
| REX3mCherry                        | REX3KpnI fw<br>REX3AvrIIrv                                                                                        | cDNA                                                                       | REX2mCherry<br>(Grüiring et. al 2012)         |
| STEVORmCherry                      | STEVOR KpnI fw<br>STEVOR AvrII rv                                                                                 | 3D7 genomic DNA                                                            | REX2mCherry<br>(Grüiring et. al 2012)         |
| pARL2-T2A-mCherry                  | pARL2 XhoI fw<br>pARL2-2A-AvrIIrv                                                                                 | pARL1-GFP                                                                  | pARL2 GFP-mCherry                             |
| SBP1-mDHFR-GFP-2A<br>REX3mCherry   | SBP-1fw(XhoI)/GFPrvSpe<br>REX3 fw AvrII/ REX3 rv KpnI                                                             | SBP-1mDHFR-GFP<br>cDNA                                                     | pARL2 -T2A-mCherry                            |
| SBP1-mDHFR-GFP-2A<br>KAHRPmCherry  | SBP-1fw(XhoI)/ GFPrvSpe<br>KAHRPfwAvrII/ KAHRPrvKpnI                                                              | SBP-1mDHFR-GFP<br>cDNA                                                     | pARL2 -T2A-mCherry                            |
| SBP1-mDHFR-GFP-2A<br>STEVORmCherry | SBP-1fw(XhoI)/ GFPrvSpe<br>STEVOR fw1/STEVOR fw2 AvrII<br>STEVOR rv KpnI                                          | SBP-1mDHFR-GFP<br>3D7 genomic DNA                                          | pARL2 -T2A-mCherry                            |
| SBP1-mDHFR-GFP-2A<br>MSRP6mCherry  | SBP-1fw(XhoI)/ GFPrvSpe<br>MSRP6 fw AvrII/MSRP6 rv KpnI                                                           | SBP-1mDHFR-GFP<br>MSRP6-GFP                                                | pARL2 -T2A-mCherry                            |
| REX2-GFP-mDHFR-2A<br>KAHRPmCherry  | REX2XhoI fw/ mDHFR Spe-XmaI rv<br>KAHRP fw AvrII/ KAHRP rv KpnI                                                   | REX2GFPmDHFR<br>cDNA                                                       | pARL2 -T2A-mCherry                            |
| GST-REX1                           | Rex1-332fwBamH1<br>Rex1-596revXho1                                                                                | 3D7 genomic DNA                                                            | pGEX-6-P2                                     |
| GST-Aldolase                       | Aldolase-9-fwBamH1<br>Aldolase-96-revXho1                                                                         | cDNA                                                                       | pGEX-6-P2                                     |
| GST-SBP1-N                         | SBP1N-131fwBamH1<br>SBP1N-208revXho1                                                                              | SBP-1mDHFR-GFP                                                             | pGEX-6-P2                                     |
| GST-SERA5                          | SERA5-68fwBamH1<br>SERA5-184revXho1                                                                               | 3D7 genomic DNA                                                            | pGEX-6-P2                                     |

|                            |                                                                    |                              |                           |
|----------------------------|--------------------------------------------------------------------|------------------------------|---------------------------|
| EXP2-3xHA integration      | EXP2 Not fw/ EXP2 HA rv1 (Product 1)<br>EXP2 Not fw/ 3xHA Sall rv2 | 3D7 genomic DNA<br>Product 1 | pARL1-SLI                 |
| HSP101-3xHA integration    | HSP101Not1 fw<br>HSP101Kpn1rv                                      | 3D7 genomic DNA              | pARL1-SLI                 |
| SBP1-mDHFR-GFP integration | NotI-SBP1_F/AvrII-SBP1_R                                           | 3D7 genomic DNA              | pARL2 mDHFR-GFP-hDHFR-BSD |
